# Supplementary material for: TasA-tasB, a new putative toxin-antitoxin (TA) system from Bacillus thuringiensis pGI1 plasmid is a widely distributed composite mazE-doc TA system
Source: PubMed Central journal article supplement (PMC1626090; doi:10.1186/1471-2164-7-259), 2006-10-13
Supplement: 1471-2164-7-259-S1.pdf [file 1471-2164-7-259-S1.pdf]

| Strain                                               | TasA          | TasB        |
|------------------------------------------------------|---------------|-------------|
| <i>Alkaliphilus metalliredigenes</i> QYMF            | ZP_00799280   | ZP_00799279 |
| <i>Anaeromyxobacter dehalogenans</i> 2CP-C           | YP_466077     | YP_466078   |
| <i>Bacillus clausii</i> KSM-K16 (1)                  | YP_174516     | YP_174517   |
| <i>Bacillus thuringiensis</i> H1.1 plasmid pGI1      | not annotated | NP_705750   |
| <i>Bradyrhizobium</i> sp. BTai1                      | ZP_00863985   | ZP_00863986 |
| <i>Brucella abortus</i> 1 str. 9-941                 | YP_221320     | YP_221319   |
| <i>Brucella melitensis</i> 16M                       | NP_540292     | NP_540293   |
| <i>Brucella suis</i> 1330                            | NP_697574     | NP_697573   |
| <i>Burkholderia thailandensis</i> E264               | not annotated | YP_442084   |
| <i>Candidatus kueneia stuttgartiensis</i>            | CAJ74863      | CAJ74864    |
| <i>Carboxydotherrmus hydrogenoformans</i> Z-2901 (1) | YP_359137     | YP_359138   |
| <i>Caulobacter crescentus</i> CB15                   | not annotated | NP_422157   |
| <i>Chlorobium limicola</i> DSM 245                   | ZP_00512710   | ZP_00512679 |
| <i>Chlorobium phaeobacteroides</i> BS1               | ZP_00530611   | ZP_00530390 |
| <i>Chlorobium phaeobacteroides</i> DSM 266           | ZP_00530064   | ZP_00530036 |
| <i>Chlorobium tepidum</i> TLS                        | NP_661236     | NP_661237   |
| <i>Crocospaera watsonii</i> WH 8501                  | not annotated | ZP_00518660 |
| <i>Enterococcus faecalis</i> V583                    | AAO80241      | AAO80240    |
| <i>Enterococcus faecium</i> DO (1)                   | ZP_00603841   | ZP_00603842 |
| <i>Enterococcus faecium</i> DO (2)                   | ZP_00605043   | ZP_00605044 |
| <i>Geobacillus kaustophilus</i> HTA426 (1)           | YP_147698     | YP_147699   |
| <i>Gloeobacter violaceus</i> PCC 7421                | NP_925680     | NP_925681   |
| <i>Gluconobacter oxydans</i> 621H plasmid pGOX2 (1)  | not annotated | YP_190394   |
| <i>Halothermothrix orenii</i> H 168                  | ZP_01189565   | ZP_01189566 |
| <i>Jannaschia</i> sp. CCS1                           | YP_511394     | YP_511395   |
| <i>Lactobacillus acidophilus</i> NCFM                | YP_192967     | YP_192968   |
| <i>Lactobacillus gasseri</i> ATCC 33323 (1)          | ZP_00046978   | ZP_00046979 |
| <i>Mesorhizobium</i> sp. BNC1                        | ZP_00614863   | ZP_00614862 |
| <i>Nitrosomonas europaea</i> ATCC 19718 (1)          | not annotated | NP_842442   |
| <i>Nitrosomonas europaea</i> ATCC 19718 (2)          | not annotated | NP_841317   |
| <i>Nostoc punctiforme</i> PCC 73102                  | not annotated | ZP_00111802 |
| <i>Oceanicola batensis</i> HTCC2597                  | ZP_01000654   | ZP_01000653 |
| <i>Parachlamydia</i> sp. UWE25 (1)                   | YP_008021     | YP_008020   |
| <i>Parachlamydia</i> sp. UWE25 (2)                   | YP_008456     | YP_008455   |
| <i>Pelodictyon phaeoclathratiforme</i> BU-1          | not annotated | ZP_00588413 |
| <i>Polaromonas naphthalenivorans</i> CJ2             | ZP_01020881   | ZP_01020880 |
| <i>Prosthecochloris aestuarii</i> DSM 271            | ZP_00591716   | ZP_00591629 |
| <i>Rhodobacter sphaeroides</i> ATCC 17025 (1)        | ZP_00912800   | ZP_00912801 |
| <i>Rhodobacter sphaeroides</i> ATCC 17025 (2)        | ZP_00912210   | ZP_00912211 |
| <i>Rhodoferrax ferrireducens</i> DSM 15236           | YP_524645     | YP_524644   |
| <i>Rhodopseudomonas palustris</i> BisB18             | YP_533817     | YP_533816   |
| <i>Rhodopseudomonas palustris</i> BisB5              | YP_568550     | YP_568551   |
| <i>Rhodopseudomonas palustris</i> HaA2               | YP_485053     | YP_485054   |
| <i>Rhodospirillum rubrum</i> ATCC 11170              | YP_425070     | YP_425071   |
| <i>Salinibacter ruber</i> DSM 13855                  | YP_446906     | YP_446907   |
| <i>Solibacter usitatus</i> Ellin6076                 | ZP_00525003   | ZP_00525004 |
| <i>Staphylococcus epidermidis</i> RP62A              | not annotated | YP_189114   |
| <i>Streptococcus pneumoniae</i> TIGR4 (1)            | AAK75015      | AAK75016    |
| <i>Streptococcus pneumoniae</i> TIGR4 (2)            | ZP_00402572   | ZP_00402571 |
| <i>Synechococcus</i> sp. RS9917 (1)                  | not annotated | ZP_01081289 |
| <i>Syntrophomonas wolfei</i> Goettingen (1)          | not annotated | ZP_00664116 |
| <i>Xanthobacter autotrophicus</i> Py2                | ZP_01196919   | ZP_01196918 |
| <i>Xanthomonas axonopodis citri</i> 306 (1)          | NP_641531     | NP_641530   |
| <i>Xanthomonas campestris vesicatoria</i> 85-10      | YP_362953     | YP_362952   |
| <i>Xanthomonas oryzae</i> KACC10331                  | YP_202082     | YP_202083   |
| <i>Xanthomonas oryzae</i> MAFF 311018                | YP_452272     | YP_452273   |

| Strain                                               | TasA        | Toxin         |
|------------------------------------------------------|-------------|---------------|
| <i>Archaeoglobus fulgidus</i> DSM 4304 (1)           | NP_071181   | NP_071182     |
| <i>Archaeoglobus fulgidus</i> DSM 4304 (2)           | NP_070184   | not found     |
| <i>Bacillus anthracis</i> A2012                      | ZP_00390473 | not found     |
| <i>Bacillus anthracis</i> Ames                       | NP_842622   | not found     |
| <i>Bacillus anthracis</i> Ames Ancestor              | YP_016656   | not found     |
| <i>Bacillus anthracis</i> Sterne                     | YP_026340   | not found     |
| <i>Bacillus cereus</i> ATCC 14579                    | AAPO7157    | not found     |
| <i>Bacillus cereus</i> cytotoxis NVH 391-98          | ZP_01180954 | not found     |
| <i>Bacillus cereus</i> G9241                         | ZP_00240570 | not found     |
| <i>Bacillus clausii</i> KSM-K16 (2)                  | YP_173562   | not found     |
| <i>Bacillus clausii</i> KSM-K16 (3)                  | YP_173588   | not found     |
| <i>Bacillus halodurans</i> C-125 (1)                 | BAB07439    | BAB07440      |
| <i>Bacillus halodurans</i> C-125 (2)                 | BAB03769    | not found     |
| <i>Bacillus halodurans</i> C-125 (3)                 | BAB03789    | not found     |
| <i>Bacillus licheniformis</i> ATCC 14580             | YP_077342   | not found     |
| <i>Bacillus</i> sp. NRRL B-14911                     | ZP_01173381 | not found     |
| <i>Bacillus subtilis subtilis</i> 168                | NP_387937   | not found     |
| <i>Bacillus thuringiensis israelensis</i> ATCC 35646 | ZP_00739702 | not found     |
| <i>Bacillus thuringiensis</i> konkukian 97-27        | YP_034407   | not found     |
| <i>Bacillus weihenstephanensis</i> KBAB4             | ZP_01185739 | not found     |
| <i>Carboxydotherrmus hydrogenoformans</i> Z-2901 (2) | YP_359074   | not found     |
| <i>Carboxydotherrmus hydrogenoformans</i> Z-2901 (3) | YP_361415   | not found     |
| <i>Clostridium acetobutylicum</i> ATCC 824 (1)       | AAK79903    | AAK79902      |
| <i>Clostridium acetobutylicum</i> ATCC 824 (2)       | AAK81571    | not found     |
| <i>Clostridium acetobutylicum</i> ATCC 824 (3)       | AAK81150    | not found     |
| <i>Clostridium beijerincki</i> NCIMB 8052            | ZP_00909394 | not found     |
| <i>Clostridium difficile</i> QCD-32g58               | ZP_01229320 | not found     |
| <i>Clostridium perfringens</i> 13                    | BAB82188    | not found     |
| <i>Clostridium tetani</i> E88 (1)                    | AAO34845    | not found     |
| <i>Clostridium thermocellum</i> ATCC 27405           | ZP_00503889 | not found     |
| <i>Desulfotobacterium hafniense</i> DCB-2 (1)        | ZP_00558166 | not found     |
| <i>Desulfotomaculum reducens</i> MI-1                | ZP_01150217 | not found     |
| <i>Escherichia coli</i> K12                          | NP_417263   | NP_417262     |
| <i>Escherichia coli</i> O157:H7                      | NP_311670   | NP_311669     |
| <i>Exiguobacterium sibiricum</i> . 255-15            | ZP_00540026 | not found     |
| <i>Geobacillus kaustophilus</i> HTA426 (2)           | YP_145902   | not found     |
| <i>Lactobacillus gasseri</i> (2)                     | ZP_00046120 | not annotated |
| <i>Leptospira interrogans lai</i> 56601              | AAO48979    | AAO48980      |
| <i>Moorella thermoacetica</i> ATCC 39073 (1)         | YP_429877   | YP_429878     |
| <i>Moorella thermoacetica</i> ATCC 39073 (2)         | YP_428965   | not found     |
| <i>Neisseria gonorrhoeae</i> FA 1090                 | AAW89255    | AAW89254      |
| <i>Oceanobacillus iheyensis</i> HTE831 (1)           | NP_690966   | not found     |
| <i>Oceanobacillus iheyensis</i> HTE831 (2)           | NP_690985   | not found     |
| <i>Photorhabdus luminescens laumondii</i> TTO1       | NP_928264   | NP_928265     |
| <i>Pyrobaculum aerophilum</i> IM2                    | AAL64466    | AAL64467      |
| <i>Pyrococcus abyssi</i> GE5 (1)                     | CAB49684    | CAB49685      |
| <i>Pyrococcus abyssi</i> GE5 (2)                     | CAB49041    | CAB49040      |
| <i>Pyrococcus abyssi</i> GE5 (3)                     | CAB50135    | not annotated |
| <i>Pyrococcus furiosus</i> DSM 3638                  | AAL80697    | AAL80698      |
| <i>Pyrococcus horikoshii</i> OT3                     | NP_142833   | NP_877801     |
| <i>Rhodobacter sphaeroides</i> 2.4.1                 | YP_345380   | YP_345381     |
| <i>Shewanella frigidimarina</i> NCIMB 400            | ZP_00640688 | not found     |
| <i>Sulfolobus acidocaldarius</i> DSM 639             | YP_256551   | YP_256550     |
| <i>Sulfolobus tokodaii</i> 7 (2)                     | BAB65748    | BAB65747      |
| <i>Sulfolobus tokodaii</i> 7 (3)                     | BAB65851    | BAB65852      |
| <i>Sulfolobus tokodaii</i> 7 (4)                     | BAB67093    | not annotated |
| <i>Sulfolobus tokodaii</i> 7 (5)                     | NP_377538   | NP_377539     |
| <i>Symbiobacterium thermophilum</i> IAM 14863 (2)    | YP_077060   | not found     |
| <i>Syntrophomonas wolfei</i> Goettingen (2)          | EAO24116    | not found     |
| <i>Thermoanaerobacter ethanolicus</i> ATCC 33223     | ZP_00779727 | not found     |
| <i>Thermoanaerobacter tengcongensis</i> MB4 (1)      | NP_621806   | not found     |
| <i>Thermoanaerobacter tengcongensis</i> MB4 (2)      | NP_624083   | not found     |
| <i>Thermococcus kodakarensis</i> KOD1 (1)            | BAD84646    | BAD84645      |
| <i>Thermococcus kodakarensis</i> KOD1 (2)            | BAD86450    | BAD86451      |
| <i>Thermococcus kodakarensis</i> KOD1 (3)            | BAD86418    | BAD86417      |
| <i>Xanthomonas axonopodis citri</i> 306 (2)          | AAM37041    | AAM37040      |

| Strain                                               | Antitoxin                 | TasB                        |
|------------------------------------------------------|---------------------------|-----------------------------|
| <i>Acinetobacter</i> sp. ED45-25 plasmid pKLH205     | not annotated             | CAD31053                    |
| <i>Aspergillus fumigatus</i> Af293                   | not found                 | EAL85381                    |
| <i>Azoarcus</i> sp. EBN1                             | YP_159142 (aa 1 to 202)   | YP_159142 (aa 203 to 324)   |
| <i>Bifidobacterium longum</i> DJO10A                 | not found                 | ZP_00120313                 |
| <i>Caldicellulosiruptor saccharolyticus</i> DSM 8903 | not annotated             | ZP_00886106                 |
| <i>Campylobacter jejuni</i> TGH 9011                 | not annotated             | AAS99045                    |
| <i>Campylobacter jejuni</i> RM1221                   | YP_179094                 | YP_179093                   |
| <i>Chloroflexus aurantiacus</i> J-10-fl              | ZP_00766209               | ZP_00766208                 |
| <i>Clostridium tetani</i> E88 (2)                    | not annotated             | NP_782506                   |
| <i>Corynebacterium diphtheriae</i> NCTC 13129        | not annotated             | NP_939161                   |
| <i>delta proteobacterium</i> MLMS-1 (1)              | ZP_01289550               | ZP_01289540                 |
| <i>delta proteobacterium</i> MLMS-1 (2)              | ZP_01290092               | ZP_01290084                 |
| <i>Desulfotobacterium hafniense</i> DCB-2 (2)        | not annotated             | not annotated               |
| <i>Desulfotobacterium hafniense</i> Y51              | not annotated             | YP_516864                   |
| <i>Enterobacteria</i> phage P1                       | YP_006570                 | YP_006571                   |
| <i>Erwinia carotovora atroseptica</i> SCRI1043       | YP_048381                 | YP_048380                   |
| <i>Ferroplasma acidarmanus</i> Fer1                  | not found                 | ZP_00610578                 |
| <i>Francisella tularensis novicida</i> ATCC15482     | AAO83346 (aa 1 to 182)    | AAO83346 (aa 183 to 318)    |
| <i>Frankia</i> sp. CcI3                              | YP_480200                 | YP_480201                   |
| <i>Frankia</i> sp. EAN1pec                           | ZP_00568300               | ZP_00568301                 |
| <i>Fusobacterium nucleatum</i> vicentii              | not found                 | ZP_00143594                 |
| <i>Gluconobacter oxydans</i> 621H (2)                | not found                 | YP_192235                   |
| <i>Haemophilus influenzae</i> 86-028NP               | YP_249090 (aa 1 to 218)   | YP_249090 (aa 219 to 340)   |
| <i>Haemophilus influenzae</i> R2866 (1)              | ZP_00157327 (aa 1 to 218) | ZP_00157327 (aa 219 to 340) |
| <i>Haemophilus influenzae</i> R2866 (2)              | ZP_00155060 (aa 1 to 210) | ZP_00155060 (aa 211 to 333) |
| <i>Kineococcus radiotolerans</i> SRS30216            | not annotated             | EAM76999                    |
| <i>Lactobacillus reuteri</i> 100-23                  | not annotated             | ZP_01273906                 |
| <i>Lactobacillus salivarius</i> UCC118               | YP_536276                 | YP_536275                   |
| <i>Legionella pneumophila</i> Lens                   | YP_125567 (aa 1 to 193)   | YP_125567 (aa 194 to 319)   |
| <i>Magnetococcus</i> sp. MC-1                        | not annotated             | ZP_00606088                 |
| <i>Mannheimia succiniciproducens</i> MBEL55E         | not found                 | YP_089359                   |
| <i>Methanococcoides burtonii</i> DSM 6242            | not found                 | YP_564803                   |
| <i>Methanosarcina barkeri</i> fusaro                 | YP_303876                 | YP_303877                   |
| <i>Methanosarcina mazei</i> Go1                      | NP_632574                 | NP_632573                   |
| <i>Mycobacterium avium paratuberculosis</i> K-10     | not annotated             | NP_962078                   |
| <i>Mycobacterium flavescens</i> PYR-GCK              | not annotated             | not annotated               |
| <i>Mycobacterium</i> sp. KMS                         | ZP_01282318               | ZP_01282317                 |
| <i>Mycobacterium</i> sp. MCS                         | not annotated             | YP_638009                   |
| <i>Mycobacterium vanbaalenii</i> PYR-1               | not annotated             | ZP_01207819                 |
| <i>Mycoplasma mycoides</i> SC PG1                    | not annotated             | not annotated               |
| <i>Neisseria meningitidis</i> MC58                   | AAF41326                  | AAF41325                    |
| <i>Nocardioides</i> sp. JS614                        | ZP_00659468               | ZP_00659469                 |
| <i>Nostoc</i> sp. PCC 7120 plasmid pCC7120epsilon    | NP_478675                 | NP_478676                   |
| <i>Parachlamydia</i> sp. UWE25 (3)                   | YP_008471                 | YP_008472                   |
| <i>Pelobacter propionicus</i> DSM 2379               | not found                 | ZP_00678454                 |
| <i>Pseudomonas aeruginosa</i> PA01                   | not annotated             | modified NP_248743          |
| <i>Psychrobacter</i> sp. 273-4                       | YP_264166 (aa 1 to 198)   | YP_264166 (aa 199 to 330)   |
| <i>Rhodopseudomonas palustris</i> BisA53             | not annotated             | ZP_00809462                 |
| <i>Rickettsiella grylli</i>                          | not annotated             | ZP_01300114                 |
| <i>Salmonella enterica Choleraesuis</i> SC-B67       | YP_218475                 | YP_218474                   |
| <i>Salmonella enterica</i> Typhi Ty2                 | AAO69527                  | AAO69526                    |
| <i>Salmonella typhimurium</i> LT2                    | NP_462460                 | NP_462459                   |
| <i>Shewanella baltica</i> OS155                      | ZP_00583273               | ZP_00583272                 |
| <i>Shewanella oneidensis</i> MR-1                    | NP_716019 (aa 1 to 189)   | NP_716019 (aa 190 to 332)   |
| <i>Sodalis glossinidius</i> 'morsitans'              | not annotated             | YP_455242                   |
| <i>Streptococcus agalactiae</i> CJB111               | ZP_00787618               | ZP_00787605                 |
| <i>Sulfitobacter</i> sp. EE-36                       | ZP_00956017               | ZP_00956018                 |
| <i>Sulfitobacter</i> sp. NAS-14                      | ZP_00963618               | ZP_00963619                 |
| <i>Sulfolobus tokodaii</i> 7 (1)                     | not annotated             | BAB66181                    |
| <i>Symbiobacterium thermophilum</i> IAM 14863 (1)    | not found                 | YP_074705                   |
| <i>Synechococcus</i> sp. RS9917 (2)                  | ZP_01081563               | ZP_01081564                 |
| <i>uncultured archaeon</i> GZfos26G2                 | AAU83175                  | AAU83176                    |
| <i>Vibrio cholerae</i> O1 eltor N16961               | not annotated             | NP_232867                   |
| <i>Vibrio cholerae</i> RC385                         | ZP_00751723               | ZP_00751724                 |
| <i>Vibrio cholerae</i> V52                           | not annotated             | ZP_00744968                 |
| <i>Vibrio metschnikovii</i> CIP A267                 | AAO33027                  | AAO33028                    |
| <i>Wolinella succinogenes</i> DSM 1740               | not found                 | NP_907321                   |
| <i>Yersinia mollaretii</i> ATCC 43969                | ZP_00824096               | ZP_00824095                 |
| <i>Yersinia pestis</i> CO92                          | NP_405398                 | NP_405399                   |
| <i>Yersinia pestis</i> KIM                           | not annotated             | NP_669780                   |
| <i>Yersinia pestis Medievalis</i> 91001              | AAS61794                  | AAS61793                    |
| <i>Zymomonas mobilis</i> ZM4                         | not annotated             | modified NP_758996          |
