# Supplementary material for: TasA-tasB, a new putative toxin-antitoxin (TA) system from Bacillus thuringiensis pGI1 plasmid is a widely distributed composite mazE-doc TA system
Source: PubMed Central journal article supplement (PMC1626090; doi:10.1186/1471-2164-7-259), 2006-10-13

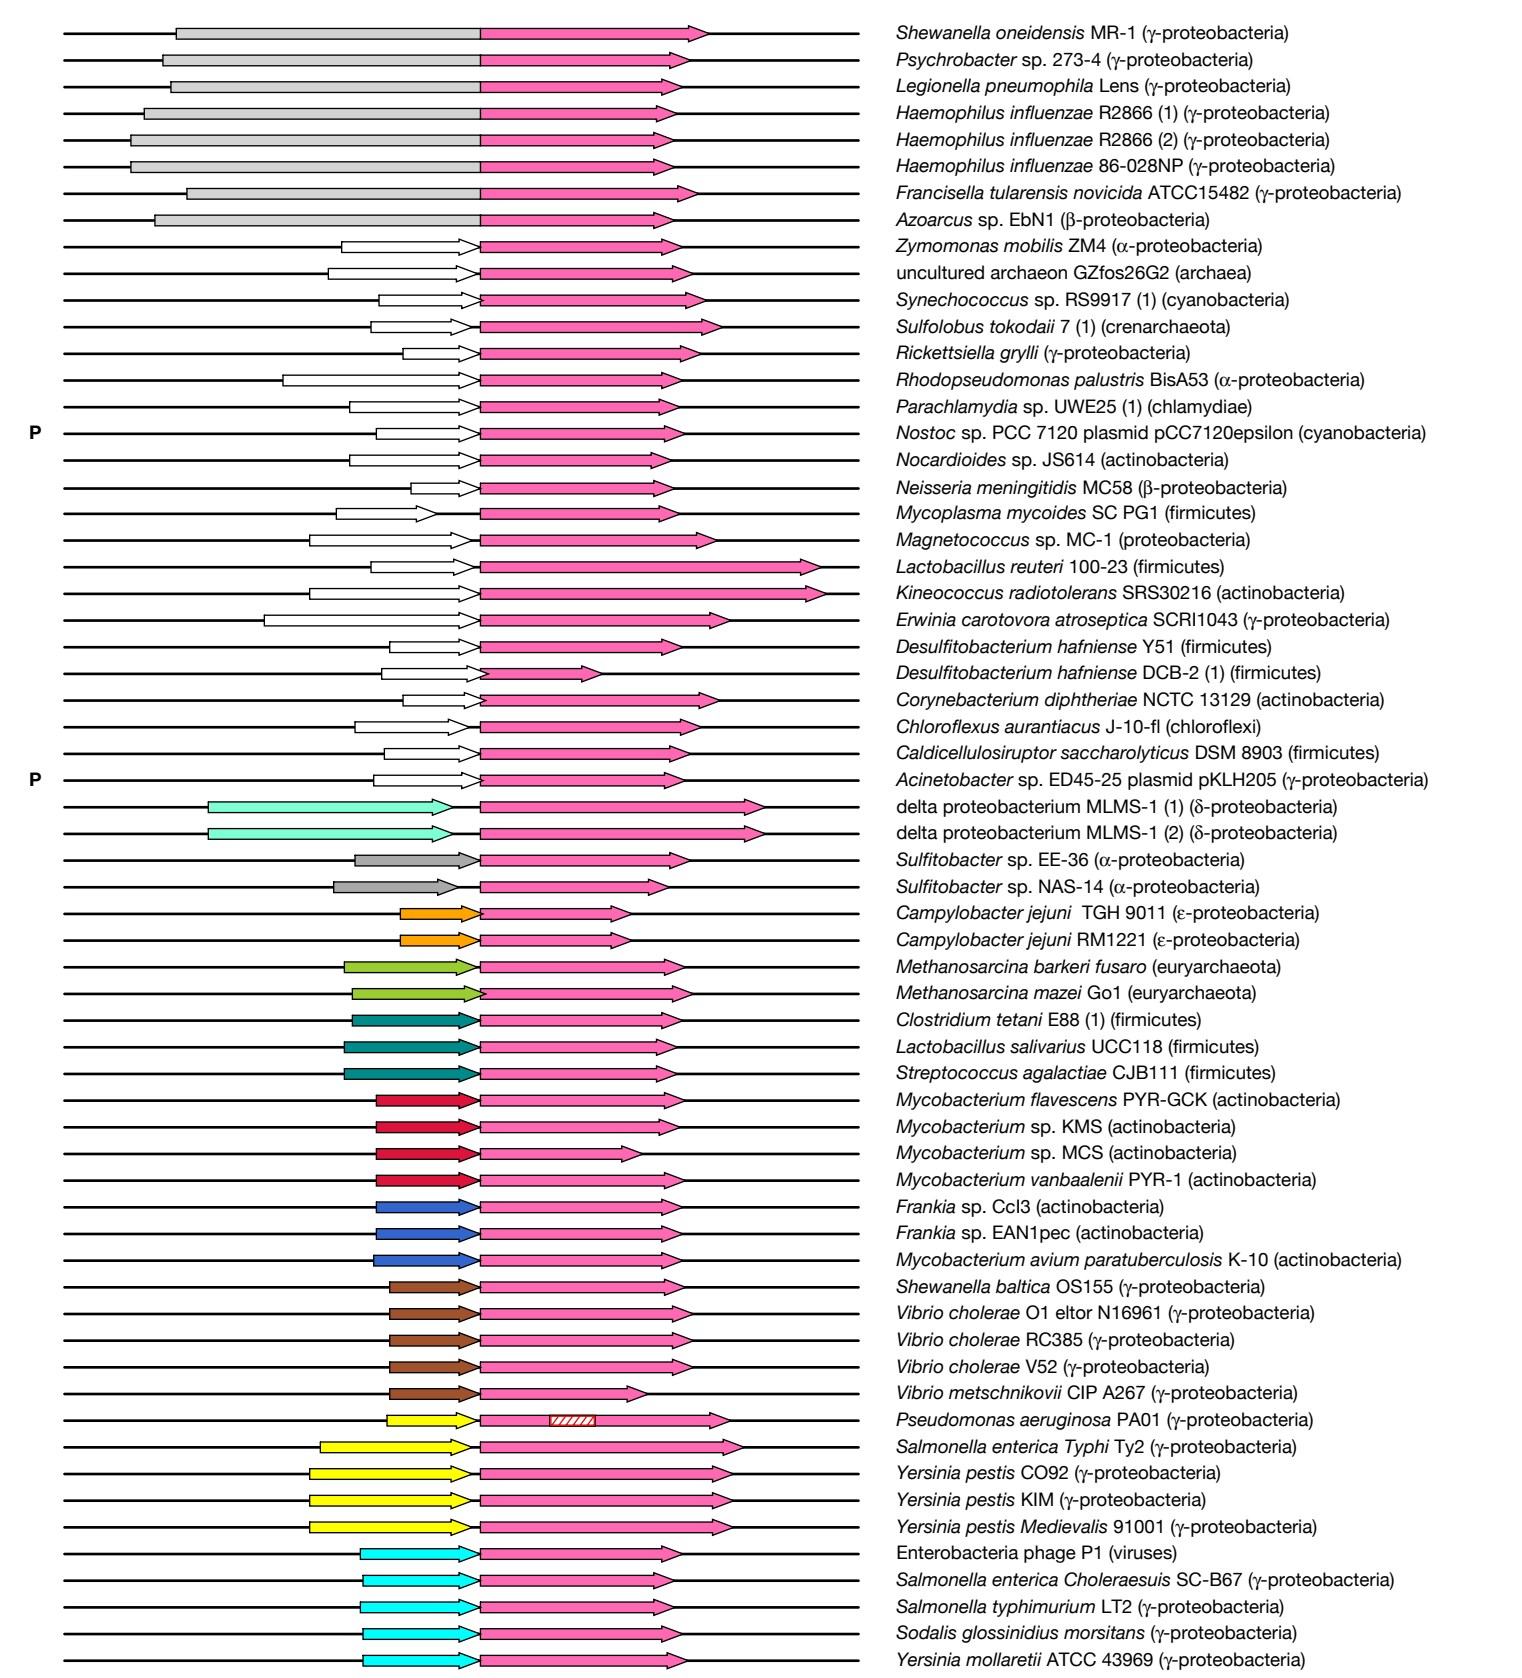

**P** *Bacillus thuringiensis* H1.1 plasmid pGI1 (firmicutes)

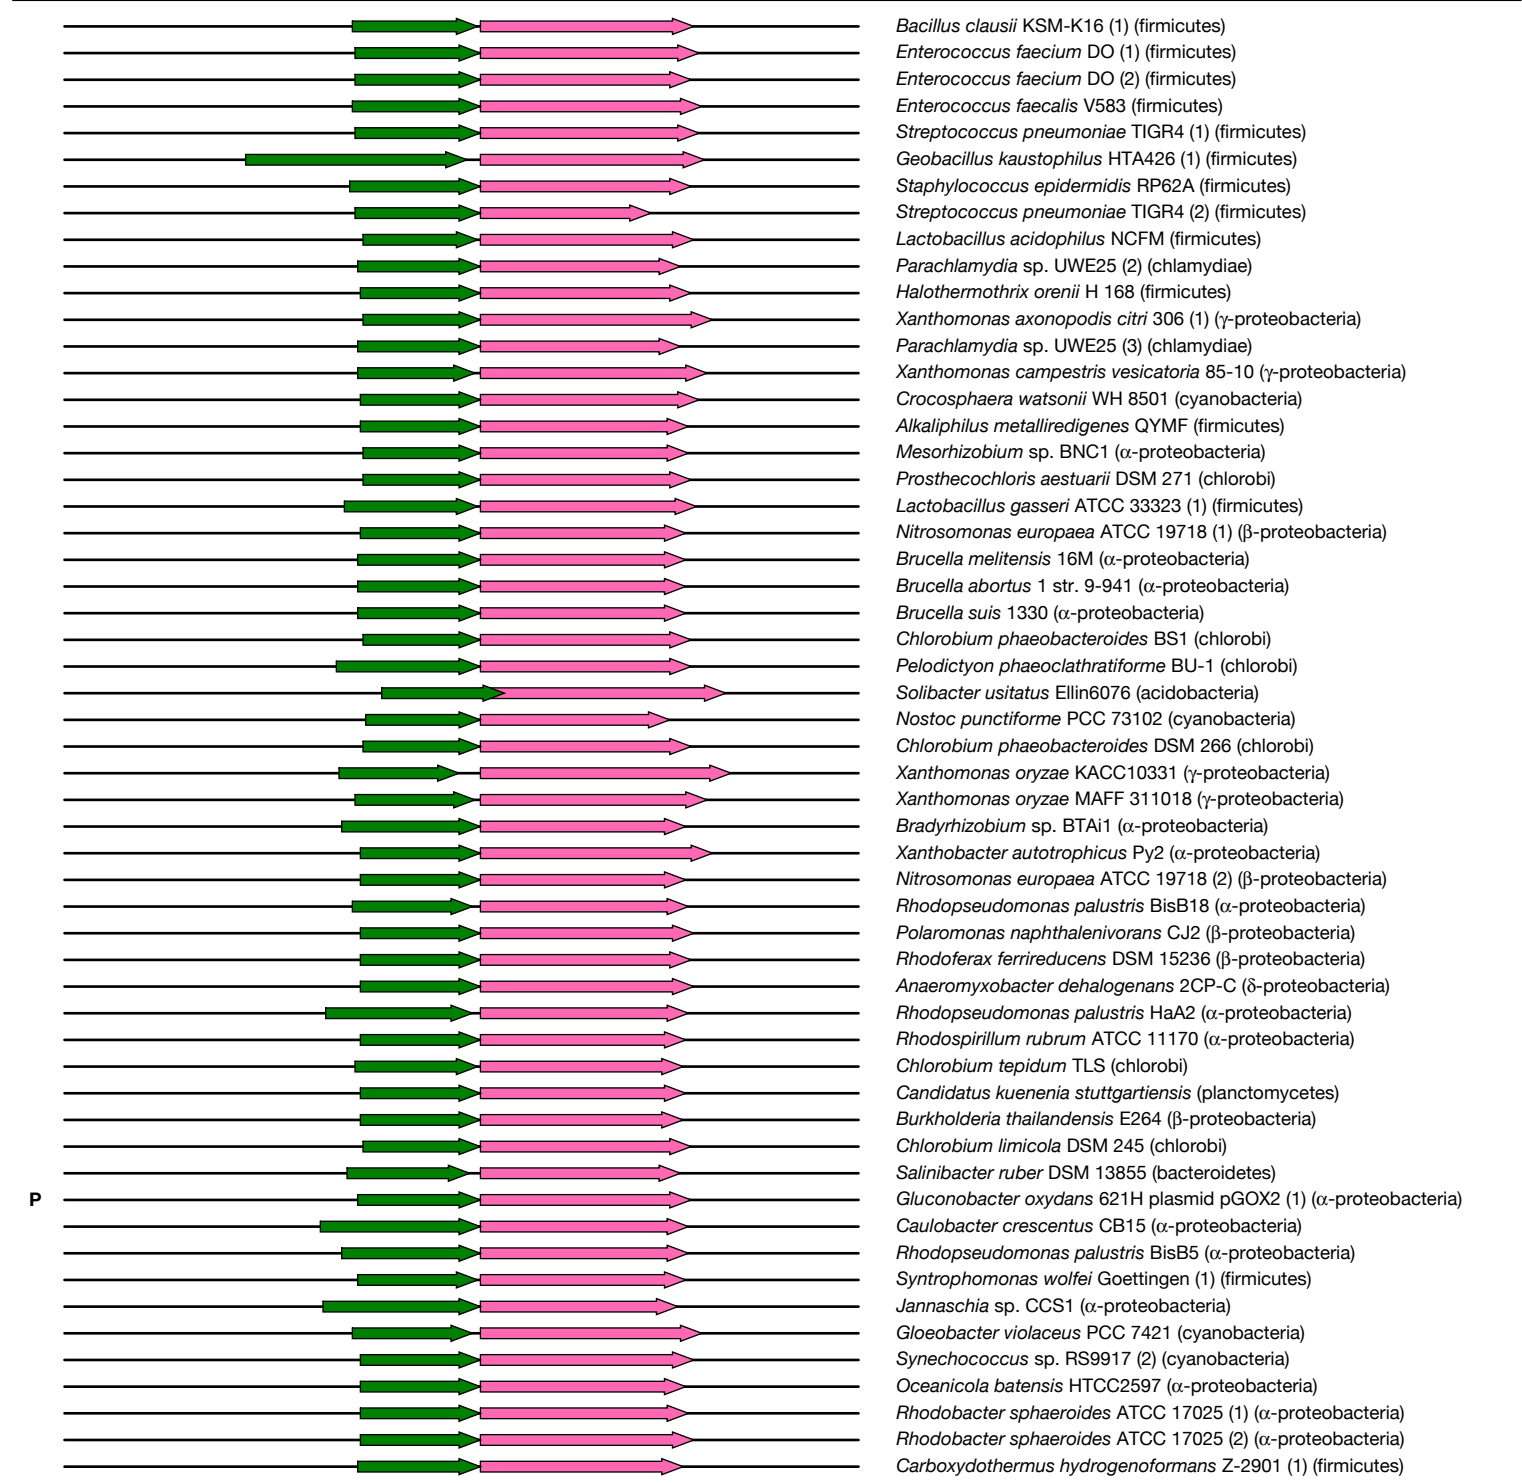

**P** *Bacillus thuringiensis* H1.1 plasmid pGI1 (firmicutes)

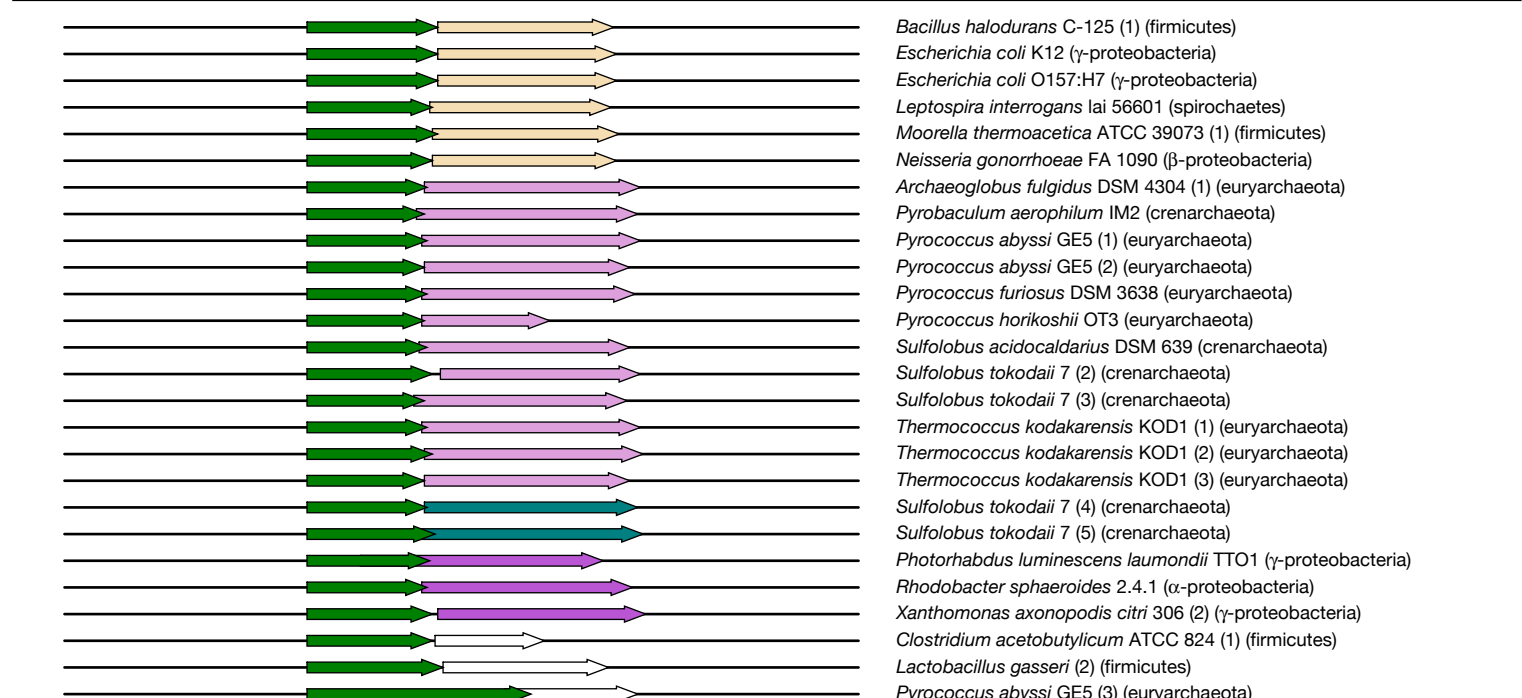

Supplement: 1471-2164-7-259-S2.pdf [file 1471-2164-7-259-S2.pdf]
