# Supplementary material for: TasA-tasB, a new putative toxin-antitoxin (TA) system from Bacillus thuringiensis pGI1 plasmid is a widely distributed composite mazE-doc TA system
Source: PubMed Central journal article supplement (PMC1626090; doi:10.1186/1471-2164-7-259), 2006-10-13
Supplement: 1471-2164-7-259-S3.pdf [file 1471-2164-7-259-S3.pdf]

1.

|                                         |                                                                                                                                                         |
|-----------------------------------------|---------------------------------------------------------------------------------------------------------------------------------------------------------|
| Enterobacteria phage P1                 | - - M Q S I N F R T A R G N L S E V L N N V E A G E E V E I T R R G R E P A V I V S K A T F E A Y K K A A L D A E F A S L F D T L D S T N K E L V N R   |
| Salmonella enterica Choleraesuis SC-B67 | - - M R T V N Y S E A R O N L A E V L E S A V T G G P V T I T R R G H K S A V I I S A E E F E R Y Q T A R M D D E F A A I M A V H G N E L R E L A D K   |
| Salmonella typhimurium LT2              | M F M R T V N Y S E A R O N L A E V L E S A V T G G P V T I T R R G H K S A V I I S A E E F E R Y Q T A R M D D E F A A I M A V H G N E L R E L A D K   |
| Sodalis glossinidius 'morsitans'        | - - M R T Y T T S Q A R O N I A E V M E A A T A G E P V E I T R R D G S A A V L I S R D D F N T W O E T K L D A E F A E I M G R H G C T I K A L A D R   |
| Yersinia mollaretii ATCC 43969          | - - M R T Y T T S T Q A R A N I S E V L D A A T H G E P I E I T R R D G S A A V V I S K A E F E A Y Q N A K L D A E F D L M M Q R H G H T L A A L T D R |
| Consensus                               | - - M r i X n X s X A R q N l a E V l e X a X X G e p v e l T R R g X X X A V i i S X X e F e X y q X a X l D a E F a X i m X X h g X t l X e l a d r   |

2.

|                                  |                                                                                                                                               |
|----------------------------------|-----------------------------------------------------------------------------------------------------------------------------------------------|
| Pseudomonas aeruginosa PA01      | - - - - - M S R S L R K S K K L V I P P R P R D E V V R A R P A L G                                                                           |
| Salmonella enterica Typhi Ty2    | - - - M V L N C P Q P L K V I I N S L D V F T S Y N - - - L R K H C Q T C M R V I I M G H A L K K A D R L Y I P P R D K S M V A K P R A A I S |
| Yersinia pestis CO92             | M Q L I R Y S L S Y T L C I N K N G Y N P F T T A E N S M C Q R F S I Y N S E D N V M S H A L K N A D R L Y I P P R D K G T K A Y P R A S M D |
| Yersinia pestis KIM              | M Q L I R Y S L S Y T L C I N K N G Y N P F T T A E N S M C Q R F S I Y N S E D N V M S H A L K N A D R L Y I P P R D K G T K A Y P R A S M D |
| Yersinia pestis Medievalis 91001 | M Q L I R Y S L S Y T L C I N K N G Y N P F T T A E N S M C Q R F S I Y N S E D N V M S H A L K N A D R L Y I P P R D K G T K A Y P R A S M D |
| Consensus                        | m q l i r y s l s y t l c i n k n g y n p f t t a e n s m c q r f s i y n s e d n v M s h a L k n a d r L y I P P R d k g t k a y p R a s m d |

|                                  |                                                             |
|----------------------------------|-------------------------------------------------------------|
| Pseudomonas aeruginosa PA01      | - - - E H Q K Q V E N A F A L A F E R Y E K T F E E L A K V |
| Salmonella enterica Typhi Ty2    | K A C S H T G Q V K N A F E F G F A R Y E K A M E E L S K V |
| Yersinia pestis CO92             | T S S T H A D Q V K N A F A F G F S R Y E K A M E E L S K V |
| Yersinia pestis KIM              | T S S T H A D Q V K N A F A F G F S R Y E K A M E E L S K V |
| Yersinia pestis Medievalis 91001 | T S S T H A D Q V K N A F A F G F S R Y E K A M E E L S K V |
| Consensus                        | t s s t H a d Q V k N A F a f g F s R Y E K a m E E L s K V |

3.

|                                  |                                                                                                                   |
|----------------------------------|-------------------------------------------------------------------------------------------------------------------|
| Shewanella baltica OS155         | M L N E T K K Y G V N I V E R P H V K A N K K L D L T G G C G K Q I V H S E T K L V L R T H K N T F R K K L A D M |
| Vibrio cholerae O1 eltor N 16961 | M N R K V E A Y G V D A V E R P K I K A S K K L D L T G D A G R Q I V K S E T K L A L R T H Q K T F T K L A D M   |
| Vibrio cholerae RC385            | M N R K V E A Y G V D A V E R P K I K A S K K L D L T G D A G R Q I V K S E T K L A L R T H Q K T F T K L A D M   |
| Vibrio cholerae V52              | M N R K V E A Y G V D A V E R P K I K A S K K L D L T G D A G R Q I V K S E T K L A L R T H Q K T F T K L A D M   |
| Vibrio metschnikovii CIP A267    | M N R K V E A Y G V D A V E R P K I K A S K K L D L T G D A G R Q I V K S E T K L A L R T H Q K T F T K L A D M   |
| Consensus                        | M n r k v e a Y G V d a V E R P k i K A s K K L D L T G d a G r Q I V k S E T K L a L R T H q k T F t K L A D M   |

4.

|                                           |                                                                                                                                                                               |
|-------------------------------------------|-------------------------------------------------------------------------------------------------------------------------------------------------------------------------------|
| Frankia sp. Ccl3                          | M T L R L T D D E A <sup>10</sup> E A L R L R S E L E <sup>20</sup> Q R S M Q E I A R E A I R E Y I E A H S R A E L L D Q V L <sup>30</sup> D E E L P R Y A E A L R W L G E - |
| Frankia sp. EAN1pec                       | M T L R L T D D E T E A L R L R S E L E R R S M Q E I A R Q A I R E Y I E A H S R A E L L D Q V L <sup>40</sup> D E E L P R Y A E A L R R L G E -                             |
| Mycobacterium avium paratuberculosis K-10 | M T L R P S E Q Q A E A L R R Q A T A E G R S M Q A V A L S A I D E Y I A R R A H K T K V A A A L <sup>50</sup> Q W V V R E E A G V L E R L K D A                             |
| Consensus                                 | M T L R l t d d e a E A L R l r s e l e X R S M Q e i A r X A I r E Y I e a h s r a e l l d q v L d e e l p r y A e a L r r L g e -                                           |

5.

|                                  |                                                                                                                                   |
|----------------------------------|-----------------------------------------------------------------------------------------------------------------------------------|
| Mycobacterium flavescens PYR-GCK | M P A L N I E F T D D E L A T V R A A A S G S G T S M R A F A R Q A I L D R A V D R E G R I R A L G E E I A Q R S A E L N O R L A |
| Mycobacterium sp. KMS            | M P S L N V D F D D A E M E Q I R A A A K Q D D L S L K K F V H A A V M E R A S M H K R R V A E A A R V V A E R S A E L N R R L A |
| Mycobacterium sp. MCS            | M P S L N V D F D D A E M E Q I R A A A K Q D D L S L K K F V H A A V M E R A S M H K R R V A E A A R V V A E R S A E L N R R L A |
| Mycobacterium vanbaalenii PYR-1  | M P S L N V S F T E E L A T V R A A A A N D E V S L R T F A H A A I L S A A S E H R R V A E A A R I V A E R S A E L N R R L A     |
| Consensus                        | M P s L N v X F X d X E X X X X R A A A X X d X X S I X X F X h a A X X X r A s X h X r R v a e a a r X v A e R S A E L N r R L A |

6.

|                                 |                                                                                                                                   |
|---------------------------------|-----------------------------------------------------------------------------------------------------------------------------------|
| Clostridium tetani E88 (2)      | M Q V N I N N L V S I S E A N Q N F S R V A R M V D E N G A A I I L K N N A P R Y V L I D Y S K F Q Q D T - - - - I A D D A T V   |
| Lactobacillus salivarius UCC118 | M Q I N L E N L I P I T E A N Q N F S K V A R M V D S K G T A V I L K N N R P K Y V L V D Y N T L V Q E E Q T E A V V A D Q A S V |
| Streptococcus agalactiae CJB111 | M Q I N I E N L V S I S E A N Q N F S K V A R M V D A N G T A V I L K N N T P K Y V L V D Y Q S L I K E E Q D T P V V V E Q T T L |
| Consensus                       | M Q i N i e N L v s i s E A N Q N F S k V A R M V D X n G t A v I L K N N X P k Y V L v D Y X X I X q e e q X X X v v a d q a t v |

|                                 |                                         |
|---------------------------------|-----------------------------------------|
| Clostridium tetani E88 (2)      | E E A A N N I L N K H L K A F E E L A K |
| Lactobacillus salivarius UCC118 | D E V A S S I L S R H L E A L K E L A K |
| Streptococcus agalactiae CJB111 | D E V A T S V L S R H L D A F K E L A K |
| Consensus                       | d E v A X s i L s r H L X A f k E L A K |

7.

|                               |                                                                                                                                                                       |
|-------------------------------|-----------------------------------------------------------------------------------------------------------------------------------------------------------------------|
| Methanosarcina barkeri fusaro | M S T I A I D P D V K K S L K E F K I T E N E S Y N S I I K R L I V K V K E T A E Y K P M F P K E E N T E R R E S H V K D F D A W L D R K L I E D K E I L D A L G R K |
| Methanosarcina mazei Go1      | M S T I A I D P D V K E S L K E L K L A P E E S Y N S V V K R L I G E V K K K E D Y S P M F P K E E K Q G H K E S H I N D F D A W L E K K L V E D K N I L D A L G R K |
| Consensus                     | M S T I A I D P D V K X S L K E X K X X X X E S Y N S X X K R L I X X V K X X X X Y X P M F P K E E X X X X X E S H X X D F D A W L X X K L X E D K X I L D A L G R K |

8.

|                               |                                                                                                   |
|-------------------------------|---------------------------------------------------------------------------------------------------|
| Campylobacter jejuni TGH 9011 | M K T T E Y N T O Q K N N K E Y L A E R E A V K K N Y G K N G K R V R K T C Y K C G V S K T - - - |
| Campylobacter jejuni RM1221   | M K T T E Y N T O Q K N N K E Y L A E R E A V K K T M A K M E K E L E K P A I N A V F O R L K N K |
| Consensus                     | M K T T E Y N T O Q K N N K E Y L A E R E A V K K K K K                                           |

9.

|                          |    |    |    |    |    |    |    |    |   |   |   |   |   |   |   |   |   |   |   |   |   |   |   |   |   |   |   |   |   |   |   |   |   |   |   |   |   |   |   |   |   |   |   |   |   |   |   |   |   |   |   |   |   |   |   |   |   |   |   |   |   |   |   |   |   |   |   |   |   |   |   |   |   |   |   |   |   |
|--------------------------|----|----|----|----|----|----|----|----|---|---|---|---|---|---|---|---|---|---|---|---|---|---|---|---|---|---|---|---|---|---|---|---|---|---|---|---|---|---|---|---|---|---|---|---|---|---|---|---|---|---|---|---|---|---|---|---|---|---|---|---|---|---|---|---|---|---|---|---|---|---|---|---|---|---|---|---|---|
|                          | 10 | 20 | 30 | 40 | 50 | 60 | 70 | 80 |   |   |   |   |   |   |   |   |   |   |   |   |   |   |   |   |   |   |   |   |   |   |   |   |   |   |   |   |   |   |   |   |   |   |   |   |   |   |   |   |   |   |   |   |   |   |   |   |   |   |   |   |   |   |   |   |   |   |   |   |   |   |   |   |   |   |   |   |   |
| Sulfitobacter sp. EE-36  | M  | T  | R  | V  | T  | A  | T  | E  | F | K | N | I | G | A | F | S | D | A | A | M | S | E | P | V | I | I | T | S | H | Q | R | D | R | L | V | L | L | S | A | D | E | Y | R | R | L | T | A | L | T | E | G | V | T | A | O | D | K | D | R | V | A | R | G | L | E | R | H | R | S | T | I | L | E | L | A | K | R |
| Sulfitobacter sp. NAS-14 | M  | T  | R  | V  | T  | A  | T  | E  | F | K | N | I | G | A | F | S | D | A | A | M | S | E | P | V | I | I | T | S | H | Q | R | D | R | L | V | L | L | S | A | D | E | Y | R | R | L | T | A | L | T | E | G | V | T | A | O | D | K | D | R | V | A | R | G | L | E | R | H | R | S | T | I | L | E | L | A | K | R |
| Consensus                | M  | T  | R  | V  | T  | A  | T  | E  | F | K | N | I | G | A | F | S | D | A | A | M | S | E | P | V | I | I | T | S | H | Q | R | D | R | L | V | L | L | S | A | D | E | Y | R | R | L | T | A | L | T | E | G | V | T | A | O | D | K | D | R | V | A | R | G | L | E | R | H | R | S | T | I | L | E | L | A | K | R |

10.

|                                  |    |    |    |    |    |    |    |    |   |   |   |   |   |   |   |   |   |   |   |   |   |   |   |   |   |   |   |   |   |   |   |   |   |   |   |   |   |   |   |   |   |   |   |   |   |   |   |   |   |   |   |   |   |   |   |   |   |   |   |   |   |   |   |   |   |   |   |   |   |   |   |   |   |   |   |   |   |   |   |   |   |   |
|----------------------------------|----|----|----|----|----|----|----|----|---|---|---|---|---|---|---|---|---|---|---|---|---|---|---|---|---|---|---|---|---|---|---|---|---|---|---|---|---|---|---|---|---|---|---|---|---|---|---|---|---|---|---|---|---|---|---|---|---|---|---|---|---|---|---|---|---|---|---|---|---|---|---|---|---|---|---|---|---|---|---|---|---|---|
|                                  | 10 | 20 | 30 | 40 | 50 | 60 | 70 | 80 |   |   |   |   |   |   |   |   |   |   |   |   |   |   |   |   |   |   |   |   |   |   |   |   |   |   |   |   |   |   |   |   |   |   |   |   |   |   |   |   |   |   |   |   |   |   |   |   |   |   |   |   |   |   |   |   |   |   |   |   |   |   |   |   |   |   |   |   |   |   |   |   |   |   |
| delta proteobacterium MLMS-1 (1) | M  | G  | K  | V  | L  | Q  | V  | D  | N | N | F | T | P | C | P | A | Q | G | G | D | E | L | P | N | G | I | F | E | F | N | I | T | K | I | L | E | E | I | Q | K | P | A | S | F | S | L | A | E | A | V | S | D | F | P | R | E | F | S | S | I | N | E | S | H | L | D | S | V | D | L | S | R | P | V | I | L | A | E | I | A | P | G |
| delta proteobacterium MLMS-1 (2) | M  | G  | K  | V  | L  | Q  | V  | D  | N | N | F | T | P | C | P | A | Q | G | G | D | E | L | P | N | G | I | F | E | F | N | I | T | K | I | L | E | E | I | Q | K | P | A | S | F | S | L | A | E | A | V | S | D | F | P | R | E | F | S | S | I | N | E | S | H | L | D | S | V | D | L | S | R | P | V | I | L | A | E | I | A | P | G |
| Consensus                        | M  | G  | K  | V  | L  | Q  | V  | D  | N | N | F | T | P | C | P | A | Q | G | G | D | E | L | P | N | G | I | F | E | F | N | I | T | K | I | L | E | E | I | Q | K | P | A | S | F | S | L | A | E | A | V | S | D | F | P | R | E | F | S | S | I | N | E | S | H | L | D | S | V | D | L | S | R | P | V | I | L | A | E | I | A | P | G |

|                                  |    |     |     |     |     |     |     |   |   |   |   |   |   |   |   |   |   |   |   |   |   |   |   |   |   |   |   |   |   |   |   |   |   |   |   |   |   |   |   |   |   |   |   |   |   |   |   |   |   |   |   |   |   |   |   |   |   |   |   |   |   |   |   |   |   |
|----------------------------------|----|-----|-----|-----|-----|-----|-----|---|---|---|---|---|---|---|---|---|---|---|---|---|---|---|---|---|---|---|---|---|---|---|---|---|---|---|---|---|---|---|---|---|---|---|---|---|---|---|---|---|---|---|---|---|---|---|---|---|---|---|---|---|---|---|---|---|---|
|                                  | 90 | 100 | 110 | 120 | 130 | 140 | 150 |   |   |   |   |   |   |   |   |   |   |   |   |   |   |   |   |   |   |   |   |   |   |   |   |   |   |   |   |   |   |   |   |   |   |   |   |   |   |   |   |   |   |   |   |   |   |   |   |   |   |   |   |   |   |   |   |   |   |
| delta proteobacterium MLMS-1 (1) | Q  | Y   | N   | L   | I   | D   | G   | H | R | V | E | K | A | R | R | L | K | I | E | K | V | P | A | Y | R | L | D | V | E | R | H | I | K | F | L | T | S | K | R | A | Y | T | A | I | E | Y | W | N | S | K | L | T | P | G | R | K | P | R | R | K | R | G | M | A | S |
| delta proteobacterium MLMS-1 (2) | Q  | Y   | N   | L   | I   | D   | G   | H | R | V | E | K | A | R | R | L | K | I | E | K | V | P | A | Y | R | L | D | V | E | R | H | I | K | F | L | T | S | K | R | A | Y | T | A | I | E | Y | W | N | S | K | L | T | P | G | R | K | P | R | R | K | R | G | M | A | S |
| Consensus                        | Q  | Y   | N   | L   | I   | D   | G   | H | R | V | E | K | A | R | R | L | K | I | E | K | V | P | A | Y | R | L | D | V | E | R | H | I | K | F | L | T | S | K | R | A | Y | T | A | I | E | Y | W | N | S | K | L | T | P | G | R | K | P | R | R | K | R | G | M | A | S |

11.

|                                       |    |    |    |    |    |    |    |    |    |   |   |   |   |   |   |   |   |   |   |   |   |   |   |   |   |   |   |   |   |   |   |   |   |   |   |   |   |   |   |   |   |   |   |   |   |   |   |   |   |   |   |   |   |   |   |   |   |   |   |   |   |   |   |   |   |   |   |   |   |   |   |   |   |   |   |   |   |   |   |   |   |   |   |   |   |   |   |   |   |   |
|---------------------------------------|----|----|----|----|----|----|----|----|----|---|---|---|---|---|---|---|---|---|---|---|---|---|---|---|---|---|---|---|---|---|---|---|---|---|---|---|---|---|---|---|---|---|---|---|---|---|---|---|---|---|---|---|---|---|---|---|---|---|---|---|---|---|---|---|---|---|---|---|---|---|---|---|---|---|---|---|---|---|---|---|---|---|---|---|---|---|---|---|---|---|
|                                       | 10 | 20 | 30 | 40 | 50 | 60 | 70 | 80 | 90 |   |   |   |   |   |   |   |   |   |   |   |   |   |   |   |   |   |   |   |   |   |   |   |   |   |   |   |   |   |   |   |   |   |   |   |   |   |   |   |   |   |   |   |   |   |   |   |   |   |   |   |   |   |   |   |   |   |   |   |   |   |   |   |   |   |   |   |   |   |   |   |   |   |   |   |   |   |   |   |   |   |
| Bacillus halodurans C-125 (1)         | -  | -  | -  | -  | -  | M  | P  | V  | F  | D | R | C | N | L | V | Y | V | D | F | N | F | Q | S | H | D | O | A | C | T | R | P | A | I | V | L | S | P | K | L | F | N | K | N | T | G | F | A | V | V | C | P | I | T | R | - | - | - | - | - | Q | O | K | G | Y | P | F | E | I | E | I | P | P | G | L | P | I | E | G | V | I | L | T | D | O | V | K | S | L | D | W |
| Escherichia coli K12                  | -  | -  | -  | M  | V  | S  | R  | Y  | V  | P | D | M | G | D | L | I | W | V | D | F | D | F | T | K | G | S | E | Q | A | G | H | R | P | A | V | V | L | S | P | F | M | Y | N | N | K | T | G | M | C | L | C | V | P | C | T | T | - | - | - | - | Q | S | K | G | Y | P | F | E | V | L | S | - | G | O | E | R | D | G | V | A | L | A | D | O | V | K | S | I | A | W |
| Escherichia coli O157:H7              | -  | -  | -  | M  | V  | S  | R  | Y  | V  | P | D | M | G | D | L | I | W | V | D | F | D | F | T | K | G | S | E | Q | A | G | H | R | P | A | V | V | L | S | P | F | M | Y | N | N | K | T | G | M | C | L | C | V | P | C | T | T | - | - | - | - | Q | S | K | G | Y | P | F | E | V | L | S | - | G | O | E | R | D | G | V | A | L | A | D | O | V | K | S | I | A | W |
| Leptospira interrogans lai 56601      | -  | M  | V  | K  | N  | R  | N  | Y  | T  | P | E | K | G | D | I | V | W | L | N | F | T | P | O | A | G | H | E | Q | K | R | R | P | A | L | V | L | S | P | K | E | Y | N | S | K | T | G | L | A | I | F | C | P | I | T | S | - | - | - | - | K | I | K | G | Y | P | F | E | V | L | I | K | - | S | K | I | D | G | V | I | L | S | D | O | V | K | N | L | D | W |   |
| Moorella thermoacetica ATCC 39073 (1) | M  | V  | N  | E  | M  | E  | T  | Y  | I  | P | E | R | G | D | I | V | W | L | O | F | D | R | A | G | H | E | Q | A | G | R | R | P | A | L | V | I | S | P | O | L | Y | N | G | K | V | G | L | A | L | F | C | P | V | T | T | - | - | - | - | K | A | K | G | Y | P | F | E | V | E | I | P | A | G | L | K | I | T | G | V | I | L | A | D | O | V | K | S | L | D | W |
| Neisseria gonorrhoeae FA 1090         | -  | -  | -  | -  | -  | M  | Y  | I  | P  | E | R | G | D | I | F | H | L | A | F | D | P | A | A | G | T | E | M | K | G | H | Y | A | I | A | L | S | P | R | A | Y | N | R | A | T | C | L | V | Y | A | C | P | I | S | Q | G | R | A | A | A | A | R | S | G | M | I | S | T | L | L | G | T | G | T | A | T | O | G | N | V | H | C | H | R | M | K | A | L | D | W |   |
| Consensus                             | -  | -  | -  | X  | X  | X  | X  | Y  | X  | P | X | X | G | d | X | X | w | X | X | F | d | P | X | X | C | X | e | q | a | C | X | r | p | A | X | v | I | S | P | X | Y | N | X | k | t | C | X | X | X | c | P | X | I | X | - | - | - | - | X | X | k | G | y | p | f | e | v | X | X | X | G | X | X | X | G | v | X | I | X | d | q | v | K | s | I | d | W |   |   |   |

|                                       |     |     |     |   |   |   |   |   |   |   |   |   |   |   |   |   |   |   |   |   |   |   |   |   |   |   |   |   |   |
|---------------------------------------|-----|-----|-----|---|---|---|---|---|---|---|---|---|---|---|---|---|---|---|---|---|---|---|---|---|---|---|---|---|---|
|                                       | 100 | 110 | 120 |   |   |   |   |   |   |   |   |   |   |   |   |   |   |   |   |   |   |   |   |   |   |   |   |   |   |
| Bacillus halodurans C-125 (1)         | R   | A   | R   | N | F | H | I | K | G | O | A | P | E | E | T | V | T | D | C | L | O | L | I | H | T | F | L | S | - |
| Escherichia coli K12                  | R   | A   | R   | G | A | T | K | K | G | T | V | A | P | E | E | L | O | L | I | K | A | K | I | N | V | L | I | G | - |
| Escherichia coli O157:H7              | R   | A   | R   | G | A | T | K | K | G | T | V | A | P | E | E | L | O | L | I | K | A | K | I | N | V | L | I | G | - |
| Leptospira interrogans lai 56601      | T   | I   | R   | E | A | E | F | I | E | S | I | N | K | V | S | L | K | E | V | L | D | N | I | K | L | L | I | F | - |
| Moorella thermoacetica ATCC 39073 (1) | R   | A   | R   | E | A | O | F | A | C | K | V | P | A | G | V | V | A | E | V | O | A | K | V | Q | V | L | I | S | - |
| Neisseria gonorrhoeae FA 1090         | K   | I   | R   | A | A | F | R | E | T | V | P | D | Y | V | I | E | D | V | L | A | R | I | G | A | V | L | F | D | - |
| Consensus                             | r   | a   | R   | X | a | X | X | X | X | X | v | X | X | X | X | X | X | X | X | X | a | X | I | X | X | I | X | - |   |

12.

|                                     | 10           | 20           | 30          | 40         | 50    | 60      | 70          | 80           |                |                |               |
|-------------------------------------|--------------|--------------|-------------|------------|-------|---------|-------------|--------------|----------------|----------------|---------------|
| Archaeoglobus fulgidus DSM 4304 (1) | -MKAVIDTNVIV | YDTFEDSVFHQ  | EAQMLLDR--  | IDVWV      | IPTIV | IHEYVW  | VLKSLKVDVK  | -EIKYKVEEY   | LNHYKTKMVSENK  |                |               |
| Pyrobaculum aerophilum IM2          | -MKVLVDTNVLI | YETFEDEFERH  | AEATDIVY--  | -TNEVY     | IPTIV | LHEYI   | WLLLRHFSIS  | YAQAQAAKLEQL | LSEKNIHVICENL  |                |               |
| Pyrococcus abyssi GE5 (1)           | -MHAVIDTDILY | YDTFEDLEFHE  | EEARALLDS-- | LKSWYV     | PTIV  | LOEYI   | WFFKRNNSLL  | -DAKSMLEMY   | VRDPRFKGLGESH  |                |               |
| Pyrococcus abyssi GE5 (2)           | --MTVIDTNVFI | YAILRDSSEFNS | RARNLLAS--  | LERWIV     | PSIV  | LYELY   | WFFREEGYGRD | -EITNVISS    | LNSPRTRVIGDNG  |                |               |
| Pyrococcus furiosus DSM 3638        | -MHAVIDTNVLI | YDTFSDSEFKH  | ESRSLNS--   | LDRWV      | IPSIV | LOEYV   | WFFRSQGFSSR | -EAKIMLSEY   | ISDPRFRGLVEDH  |                |               |
| Pyrococcus horikoshii OT3           | -----MHIV    | LIYDTFIDSEFH | KKARSLLDS-- | LDRWY      | IPTIV | LOEYV   | WFFRSQGFSSR | -DAKIMLSEY   | IR-----        |                |               |
| Sulfolobus acidocaldarius DSM 639   | -MKILVDTNVLI | YDLVENSKFHKE | AEDILDR--   | AETWV      | IPSVV | VHELW   | VFLRANLER-- | ---MDYVSAY   | VESPKAEIVCEDF  |                |               |
| Sulfolobus tokodaii 7 (2)           | -----MYS     | TTFEDSERHKE  | AMKILT--    | ENEVVI     | POIVV | YIYI    | WVLRARLTNN  | ---VDLVKQK   | LEELKDFEIAKEDL |                |               |
| Sulfolobus tokodaii 7 (3)           | MEKAI        | IDTNV        | IYDYVEDSEY  | HKKAEEL    | LDS-- | LNKWI   | IPAIV       | IHELW        | VFLKDMKLEDK--  | INDVFAY        | VRNEKAEVICDSV |
| Thermococcus kodakarensis KOD1 (1)  | -MHAVIDTNVLL | YDTFEDLPFHH  | KARRLLDS--  | LDRWYV     | PIV   | LOEYV   | WFFRKNLPVK  | -LARSMLEMY   | LDDPRFNRLNDNG  |                |               |
| Thermococcus kodakarensis KOD1 (2)  | -MEAVIDTNVFL | YAAVEEMPRH   | REAFELLS    | SPSLEK     | WIV   | PTIV    | IYEVV       | WNFRKLGFSSE  | -EARELVEQ      | IVEDERTKLVDDR- |               |
| Thermococcus kodakarensis KOD1 (3)  | --MTVIDTNVFI | YATLRDSEFN   | AEARLLAG--  | LERWIV     | PSIV  | LYELY   | WFFREEGYKSE | -EINNVISS    | LNSPRTRVICDTG  |                |               |
| Consensus                           | -mXXv        | idtnvXi      | Ydtfedsefh  | XeaXXIIXS- | -IXXW | XiPXiVi | XEYvWffr    | XXXXXXXX     | XXXXXXXXXy     | XXXXXXXXXXXXXX |               |

|                                     | 90      | 100            | 110      | 120         | 130      | 140                |               |          |               |      |
|-------------------------------------|---------|----------------|----------|-------------|----------|--------------------|---------------|----------|---------------|------|
| Archaeoglobus fulgidus DSM 4304 (1) | QIVLSA  | LERIVGGGLS     | LSRYNDEL | ILAVAGREK   | ISLATF   | DERLRRROARARGVEVIP | ----          |          |               |      |
| Pyrobaculum aerophilum IM2          | SDLAAG  | IRMAAEDGAK     | PSNINDYI | ILASALNRGLA | LATYDRE  | LRRAGARRAVTVLPATL  | ----          |          |               |      |
| Pyrococcus abyssi GE5 (1)           | EVIHA   | LKILEENEL      | SLSHFND  | AILLYQA     | FSRKYP   | LATFDEKLRK         | LATKHGIRVLP   | EII--    |               |      |
| Pyrococcus abyssi GE5 (2)           | RYTKRA  | LELTKNP        | -----RR  | FNDMI       | ILATAEQ  | KRLATYDKRL         | KKEAERLGIETMP | ----     |               |      |
| Pyrococcus furiosus DSM 3638        | NVILRA  | IDILERENL      | SLSRFND  | MILLVHA     | IE-KGT   | LATFDQKLRK         | LARKLSVEILP   | ----     |               |      |
| Pyrococcus horikoshii OT3           | -----   | -----          | -----    | SKL         | TFSK     | GKTS               | LCHSLMI       | ----     |               |      |
| Sulfolobus acidocaldarius DSM 639   | DVLKN   | AMEIILREK      | ISLSRYND | PVILSHA     | ILRKL    | PLSTFDRRL          | SNLAKRYG      | IDIVK    | ----          |      |
| Sulfolobus tokodaii 7 (2)           | EDMIKGI | EMLKKNK        | PIRMLND  | YIILAIA     | KRLNIG   | LATYDIELV          | KAGVRNSVN     | IYSQHSS  |               |      |
| Sulfolobus tokodaii 7 (3)           | NNIVDS  | LEILIREK       | LPLADYK  | DMIILSHA    | IREKLP   | LVTFDK             | LLSKII        | AKKYGV   | SVVS          | ---- |
| Thermococcus kodakarensis KOD1 (1)  | ESIVY   | ALELIEKNS      | LSRSFN   | DAIILY      | HALQRSY  | PLATFD             | KKFRKLAV      | KNGVEVLP | PAKV-         |      |
| Thermococcus kodakarensis KOD1 (2)  | RYLIKAF | E TLQSL        | S L - -  | THYND       | SVLLT    | IATEVGA            | LATYDKKRR     | KRAK     | LG I KLLPEVVE |      |
| Thermococcus kodakarensis KOD1 (3)  | KYTKRA  | LELTRNP        | -----K   | RFDN        | MVIL     | ATAEDFKR           | LATYDKRL      | KKEA     | KL E I K TLP  | ---- |
| Consensus                           | XXXXXax | EXXXXXXXXXXXXX | ndXXIIX  | aXXXXXXXX   | laTfdXXI | XkXa               | XXXg          | XXXXp    | ----          |      |

13.

|                                         |                                                                                                                                                                   |
|-----------------------------------------|-------------------------------------------------------------------------------------------------------------------------------------------------------------------|
| Photorhabdus luminescens laumondii TTO1 | M I R V P S Q Y A R S L D L R C C W S V F E H S A V S C R Q I S S S V E M K R M V G V K S C G F I D I S V O V L N E V A H V C V R K L K M S W E E I A E F L D I V |
| Rhodobacter sphaeroides 2.4.1           | -----MSAEFADTNVILYLLDN - GPKADCAEEILGHRPRISVQVLNEITLVNCRKAGLSWEEAGAFLEGV                                                                                          |
| Xanthomonas axonopodis citri 306 (2)    | -----MFLDSNVVLYLLEDVAVKADGAEALLQRPRVISVQVLNEVTHVVCVRK LKM GWDVVGQFLALV                                                                                            |
| Consensus                               | -----XXXXFXdsnVXlyllsXXXXkadXaeXXIXXrpXISVQVLNEvXhVcVRKl kmsWeEXgXFLXXV                                                                                           |

|                                         |                                                                                                                                           |
|-----------------------------------------|-------------------------------------------------------------------------------------------------------------------------------------------|
| Photorhabdus luminescens laumondii TTO1 | R S F C K I V P L T V E V H D R A R L I A E R Y R L S F Y D S C I V A A A V I A G C R T L Y S E D M N H G Q M L E D S L V I K N P F S Y V |
| Rhodobacter sphaeroides 2.4.1           | R A L C P V E S L T I Q T H D V G R A L A E R Y G F S I Y D S I I V A S A L V A G C T T L W S E D M Q D G L L V E G Q L R I V N P F A - - |
| Xanthomonas axonopodis citri 306 (2)    | R S F C K I V P L T V D V H D R A R Q L A E R H Q L S F Y D A C I V A A A A I E G C Q T L Y S E D M H H G L I I E E S L S I R N P F N V - |
| Consensus                               | R s f c k i v p L T v X v H D r a R X I A E R y X I S f Y D s c I V A a A X i a G C X T L y S E D M X h G I X X E X s L X I X N P F X X - |

14.

|                           |                                                                                                                                                          |
|---------------------------|----------------------------------------------------------------------------------------------------------------------------------------------------------|
| Sulfolobus tokodaii 7 (4) | -----VDTSFLLP LVG I K V K G I K D S L L E G K A I Y Y P N L L L T E L L A V I F K E A K K L K L N K V P E A M K G L I Y V L S N V N - L I S I E E L E    |
| Sulfolobus tokodaii 7 (5) | MKRSKIVMRIL I DTSFILPALG DVG - - E E I N I I K E F Y N H E V Y F T E L S L L E A M W V I K R L I K Q G I E V D F N V V K T G L K S I N K T Y R L V K I P |
| Consensus                 | XXXXXXXXXXXXX DTSFXLPXXGI X VXXXXXXXXXXXXKXXVXXXXXXXXXTELXXXXXXXXXKXXXXXXXXEXXXXXXXXX LXXXNXXXXXXXXX                                                     |

|                           |                                                                                                                 |
|---------------------------|-----------------------------------------------------------------------------------------------------------------|
| Sulfolobus tokodaii 7 (4) | I E T I Y E I L N - K G W N D I F D A I L Y T A Y K S T K I P L I T M D K S F Y N F L K E N G M D V K G I I L L |
| Sulfolobus tokodaii 7 (5) | I S A Y I K A L N D K R H N D L I D L I L Y T A K A Y N L R L S L D L K L K E I D K E N - I V I Q S L N E S     |
| Consensus                 | I X X X X X X L N X K X X N D X X D X I L Y X X X K X X X X X L X X X D X X X X X X X K E N X X X X X X X X X X |
